# Supplementary material
Source: PubMed Central journal article supplement (PMC3660791)
Supplement: tlo0603_0226SD1.pdf [file tlo0603_0226SD1.pdf]

**Table W1.** Masses of GCTs Used for (A) Immunohistochemistry, Mitotic Figures, TUNEL Assay, Percentage of Necrosis, (B) Tumors from 6-Week-Old Mice Used for Immunofluorescence, and (C) Tumors from 6-Week-Old Mice Used for Western Blot.

| (A)         |                      |                                |
|-------------|----------------------|--------------------------------|
| Age (Weeks) | Treatment Received   | Tumor Mass (g, Mean $\pm$ SEM) |
| 3           | –                    | 0.00466 $\pm$ 0.000444         |
| 4           | 0.9% NaCl            | 0.0515 $\pm$ 0.00414           |
| 4           | 5 mg/kg anti-VEGFA   | 0.0618 $\pm$ 0.00936           |
| 5           | 0.9% NaCl            | 0.178 $\pm$ 0.0564             |
| 5           | 5 mg/kg anti-VEGFA   | 0.0830 $\pm$ 0.0163            |
| 6           | 0.9% NaCl            | 0.723 $\pm$ 0.258              |
| 6           | 2.5 mg/kg anti-VEGFA | 1.08 $\pm$ 0.127               |
| 6           | 5 mg/kg anti-VEGFA   | 0.307 $\pm$ 0.151              |
| 6           | 10 mg/kg anti-VEGFA  | 0.223 $\pm$ 0.0485             |

  

| (B)                  |                                |
|----------------------|--------------------------------|
| Treatment Received   | Tumor Mass (g, Mean $\pm$ SEM) |
| 0.9% NaCl            | 1.39 $\pm$ 0.238               |
| 2.5 mg/kg anti-VEGFA | 1.08 $\pm$ 0.123               |
| 5 mg/kg anti-VEGFA   | 0.322 $\pm$ 0.0223             |
| 10 mg/kg anti-VEGFA  | 0.223 $\pm$ 0.0485             |

  

| (C)                  |                                |
|----------------------|--------------------------------|
| Treatment Received   | Tumor Mass (g, Mean $\pm$ SEM) |
| 0.9% NaCl            | 1.39 $\pm$ 0.238               |
| 2.5 mg/kg anti-VEGFA | 1.09 $\pm$ 0.127               |
| 5 mg/kg anti-VEGFA   | 0.322 $\pm$ 0.0223             |
| 10 mg/kg anti-VEGFA  | 0.223 $\pm$ 0.0485             |
